# Supplementary material
Source: Research Square preprint supplement (doi:10.21203/rs.3.rs-8729655/v1)
Supplement: Supplementary file 1 [file dd43b01919394a156c599f65.docx]

## Interview Guide

**Reproductive Concerns Among Young and Middle-Aged Patients With Colorectal Cancer**

### Opening Question

**1. After being diagnosed with colorectal cancer, how do you view issues related to childbearing?**

Probing questions:

When was the first time you thought about childbearing after your diagnosis? What was the situation at that time?
(Probe: Was it at the time of diagnosis, before treatment, or during treatment?)

Compared with before your diagnosis, how has your perspective on childbearing changed?

Has the importance of childbearing in your life plan changed before and after the diagnosis?

How do you think about and weigh cancer treatment against childbearing plans?

How did you feel when your doctor first discussed the potential impact of the disease or treatment on fertility?

Before the diagnosis, what plans or expectations did you have regarding childbearing?

Under what circumstances did you first think about childbearing after the diagnosis?

At present, do you tend to postpone, give up, persist in, or take a “wait-and-see” approach toward childbearing? Why?

What factors do you think mainly contributed to this change in perspective?
(e.g., the disease itself, treatment-related information, family influence, financial concerns)

### 2. From your personal perspective, what are your current concerns regarding childbearing?

Probing questions:

Are your concerns mainly related to your physical condition, the child’s health, financial issues, or your future caregiving ability?

How do you perceive the relationship between “being ill” and “being a parent”? Do you experience any conflict between these roles?

Which aspects of the disease or treatment are you most worried may cause irreversible effects on your body and thus affect childbearing?

Do you worry about passing disease-related risks or treatment side effects on to the next generation?

Apart from health-related issues, what other practical concerns do you have?
(e.g., financial burden, energy level, ability to accompany and raise a child)

Are these concerns mainly physical, psychological, or practical in nature?

Do you worry about genetic risks, cancer recurrence, or potential impacts on your child’s health?

Do you worry about whether you will have sufficient energy or ability to raise a child?

Which type of concern is the most distressing for you? Could you provide a specific example?

### 3. Have you discussed childbearing issues with your family members? What are their attitudes, and how have they influenced you?

Probing questions:

Under what circumstances does this topic usually arise? Who usually initiates the discussion?

What are the main opinions or suggestions from your family members (e.g., partner, parents)? Are they more supportive or more concerned?

How have their attitudes influenced your feelings and decisions? Do they create pressure or provide support?

Who first raised the issue of childbearing within the family?

Are family members’ attitudes consistent, or are there differences of opinion?

Have there been moments when you felt supported or pressured by your family?

To what extent have family members’ attitudes influenced your thoughts or decisions?

### 4. What social or practical factors do you think influence your childbearing decisions?

Probing questions:

Do you worry that the disease or childbearing plans might affect your career development or cause financial stress?

Are you concerned about opinions or attitudes from relatives, friends, or society in general (e.g., views on childbearing among cancer patients)?

Do you feel social expectations or pressure regarding childbearing or continuing the family line?

How do you perceive societal views or potential prejudice regarding fertility among cancer patients?

Do medical resources, policy support, or financial burden influence your childbearing considerations?

Have you ever experienced differential treatment because of your illness identity?

Do financial factors affect your childbearing decisions?

### 5. How do you think the disease and its treatment may specifically affect your ability to have children?

Probing questions:

Based on the information you have received, what physiological challenges might treatment pose (e.g., fertility, pregnancy-related risks)?

How has the timeline of treatment and recovery influenced your planned timing for childbearing?

Do you worry that health problems may affect your future ability or energy to raise a child?

Have healthcare professionals discussed the impact of treatment on fertility with you?

Are you aware of or have you considered fertility preservation options (e.g., egg or sperm cryopreservation)?

Have you adjusted or abandoned previous childbearing plans because of treatment?

Have these concerns changed during the course of treatment?

### 6. How do you perceive the pressure brought about by childbearing-related concerns?

Probing questions:

Do you feel this pressure comes more from external sources or from internal conflict? Does it feel more like anxiety, regret, or something else?

In your view, what do these struggles and pressures related to childbearing mean for your life?

In what ways does this pressure mainly manifest?
(e.g., emotional distress, sleep problems, interpersonal relationships, decision-making difficulties)

Under what circumstances is this pressure most pronounced?

Do you feel that this pressure is understood by others, or is it often overlooked?

How would you describe the impact of this pressure on your daily life?

### 7. How do you cope with the pressure related to childbearing concerns?

Probing questions:

What do you usually do to relieve this pressure?
(e.g., actively seeking information, talking with trusted individuals, focusing on current treatment, or temporarily avoiding the topic)

Who or what resources have been most helpful in coping with this pressure? Has the healthcare team provided support?

How do you adjust your mindset to face uncertainty and stress?

Do you actively seek information or share your concerns with others?

Have healthcare professionals, family members, or peers provided assistance?

Which coping strategies have been effective, and which have not?

After these experiences, have you gained new insights into childbearing or life planning?

### 8. Through which professional channels or specific forms would you like to receive support for childbearing-related decision-making?

Probing questions:

Which types of professionals would you prefer to seek support from?
(e.g., attending physicians, genetic counselors, psychologists, nurses)

Would you prefer face-to-face consultations, telephone follow-ups, online video consultations, or written/visual materials?

What specific information would you most like to receive during decision support?
(e.g., disease impact, treatment risks, genetic risks, psychological adjustment)

Would you like family members or partners to participate in decision-making discussions? What would their involvement mean to you?

Would you like to use professional decision-support tools or scales (e.g., risk assessment tools, decision balance sheets)?

At which stage of treatment would you prefer to receive childbearing decision support? Should it be continuous?

What factors influence your trust or preferences when choosing professional support channels?
(e.g., experience, qualifications, communication style)

If different professionals provide inconsistent advice, how would you like support in integrating the information?

Would you like psychological or emotional support during childbearing decision-making? How would this affect your decisions?

Ideally, what would the entire childbearing decision-support process look like?
(e.g., workflow, involved personnel, interaction style)

Process and Stages

At what time point would you prefer decision support to begin: at initial diagnosis, during treatment, or after treatment?

Would you prefer one-time consultation or staged, repeated support?

Participants

Which professionals would you like to be involved?
(e.g., attending physicians, nurses, psychologists, genetic counselors)

What role would you like family members or partners to play in the decision-making process?

If multiple professionals are involved, how would you like them to collaborate or divide responsibilities?

Mode of Interaction

Do you prefer face-to-face communication, telephone consultation, video conferencing, or written/electronic materials?

During interactions, would you prefer professionals to mainly provide recommendations, facilitate discussion, or support you in making autonomous decisions?

Would you prefer decision discussions to be completed in one session or adjusted gradually over multiple stages?
